1 **Control of Transposon-mediated Activation of the *glpFK* Operon of *Escherichia coli* by two**  
2 **DNA binding Proteins**

3

4

5

6

7

8 Zhongge Zhang<sup>†</sup> and Milton H. Saier, Jr.<sup>\* †</sup>

9

10

11

12

13

14

15

16

17

18 <sup>†</sup>Department of Molecular Biology, Division of Biological Sciences, University of California at  
19 San Diego, La Jolla, CA 92093-0116.

20

21

22

## DNA-binding Protein Directed Transposon Insertion

23

24

25

26

27

\*Corresponding Author: Tel +1 858 534 4084

28

Fax: +1 858 534 7108

29

E-mail: [msaier@ucsd.edu](mailto:msaier@ucsd.edu)

30

Mail: 9500 Gilman Drive, La Jolla, CA

31

32

33

34

35

36 Key words: stress-induced mutagenesis, transposon, glycerol utilization, nutrient starvation,

37 cyclic AMP-Crp

38

39

40 **Abstract**

41 *Escherichia coli* cells deleted for the cyclic AMP (cAMP) receptor protein (Crp) gene  
42 ( $\Delta crp$ ) cannot utilize glycerol because cAMP-Crp is a required positive activator of glycerol  
43 utilization operon *glpFK*. We have previously shown that a transposon, Insertion Sequence 5  
44 (IS5), can reversibly insert into the upstream regulatory region of the operon so as to activate  
45 *glpFK* and enable glycerol utilization. GlpR, which represses *glpFK* transcription, binds to the  
46 *glpFK* upstream region near the site of IS5 insertion, and prevents insertion. We here show that  
47 the cAMP-Crp complex, which also binds to the *glpFK* upstream regulatory region, also inhibits  
48 IS5 hopping into the activating site. This finding allowed us to identify conditions under which  
49 wild type cells can acquire *glpFK*-activating IS5 insertions. Maximal rates of IS5 insertion into  
50 the activating site require the presence of glycerol as well as a non-metabolizable sugar analogue  
51 that lowers cytoplasmic cAMP concentrations. Under these conditions, IS5 insertional mutants  
52 accumulate and outcompete the wild type cells. Because of the widespread distribution of  
53 glucose analogues in nature, this mechanism of gene activation could have evolved by natural  
54 selection.

## 55 **Introduction**

56 Wild type *E. coli* cells can grow on glycerol as a sole carbon source, but cells lacking the  
57 cAMP receptor protein (Crp) cannot (Lin, 1976, Won et al., 2009, Fic et al., 2009). In a previous  
58 communication (Zhang and Saier, 2009a), we showed that a  $\Delta crp$  strain could mutate to rapid  
59 glycerol utilization due to insertion of the small transposon, Insertion Sequence 5 (IS5) (Sousa et  
60 al., 2013). To cause activation, IS5 hops into a single site, in a single orientation, upstream of the  
61 *glpFK* operon promoter. The presence of IS5 at this site activates the *glpFK* promoter so that it  
62 becomes stronger than that in wild type cells (Zhang and Saier, 2009a). Interestingly, a gene-  
63 activating IS5 insertion is capable of undergoing subsequent precise excision (Zhang et al.,  
64 2010), showing that IS5-mediated operon activation can be a fully reversible process. The  
65 *glpFK*-activating insertional event occurred at high frequency in the presence of glycerol, but not  
66 in the presence of glucose or other carbon sources. Glycerol increased insertion of IS5 at this  
67 specific site, but not in other operons (Zhang and Saier, 2009a, Zhang and Saier, 2011).  
68 Glycerol-promoted IS5 insertion into the *glpFK*-activating site proved to be regulated by binding  
69 of the glycerol repressor, GlpR, when bound to the four adjacent *glpFK* operators, *O1*, *O2*, *O3*  
70 and *O4* in the *glpFK* control region. However, it became clear that the effect of GlpR-binding on  
71 IS5 insertion was not mediated by increased expression of *glpFK*, or by increased growth, since  
72 binding to *O1* primarily controlled IS5 insertion without a significant impact on transcription,  
73 while binding to *O4* primarily controlled transcription (Zhang and Saier, 2009a). Thus, the  
74 negative control of IS5 insertion into the upstream activating site is a newly recognized function  
75 of GlpR that is distinct from the previously recognized function of repressing *glpFK*  
76 transcription (Zhang and Saier, 2011).

77           In a previous study, Hall has summarized situations where transposon insertion to  
78 activate cryptic operons is elevated under conditions of starvation (Hall, 1999). More recently,  
79 Wang and Wood (Wang and Wood, 2011) described another example of IS5 insertion that  
80 occurs at a higher frequency when beneficial, giving rise to activation of the *E. coli* flagellar  
81 master switch operon, *flhDC*. Insertional activation of *flhDC* substantially enhances bacterial  
82 swarming in semisolid agar media, and the swarming phenotype is beneficial under adverse  
83 conditions such as nutrient depletion. Under conditions where swarming is not permitted (liquid  
84 or on solid agar media), insertional activation of the *flhDC* operon is not beneficial, and the  
85 frequency of insertion is greatly reduced. Thus, insertion of IS5 upstream of the *flhDC* operon is  
86 another example of a mutation whose frequency is elevated under conditions where the mutation  
87 is advantageous. We have now confirmed the observations of Wang and Wood, 2011, in our  
88 laboratory (Zhang et al., 2013).

89           Since *de novo* IS5 insertion at a single site in the *glpFK* operon in  $\Delta crp$  cells is promoted  
90 by starvation in the presence of glycerol, and the insertion event relieves the starvation by  
91 enabling glycerol utilization, the question arises whether this constitutes an evolved mechanism.  
92 However, in wild type (*crp*<sup>+</sup>) cells, under the tested laboratory conditions, no such IS5 insertion  
93 mutants were obtained (Zhang and Saier, 2009a, Herring et al., 2006, Cheng et al., 2014). Our  
94 earlier studies had been conducted in a  $\Delta crp$  deletion strain which grows poorly and  
95 consequently is not present under normal environmental conditions.

96           In this communication, we first report that in  $\Delta cyaA$  *crp*<sup>+</sup> cells, IS5-mediated *glpFK*  
97 activation occurs in a manner strictly analogous to that observed in  $\Delta crp$  mutant cells. The *cyaA*  
98 gene codes for the cyclic AMP biosynthetic enzyme, adenylate cyclase, Cya (Gancedo, 2013).  
99 We further show that addition of cAMP to the growth medium, known to increase the

100 cytoplasmic cAMP concentration (Saier et al., 1982), greatly suppressed IS5 insertion  
101 specifically to this site. This effect occurred independently of GlpR, but it depended exclusively  
102 on Crp and the two adjacent Crp binding sites (CRPI and CRPII) that overlap the two GlpR  
103 binding sites *O2* and *O3*, in the *glpFK* control region (Zhang and Saier, 2009a, Weissenborn et  
104 al., 1992). It thus became clear that the conditions that predispose the *glpFK* operon to activation  
105 by IS5 in wild type cells were (i) the presence of glycerol, and (ii) the presence of an  
106 environmental agent that could lower cytoplasmic cAMP levels.

107       Non-metabolizable glucose analogues and other sugar substrates of the  
108 phosphoenolpyruvate (PEP):sugar phosphotransferase system (PTS) are among the compounds  
109 known to lower cellular cAMP concentrations by inhibiting adenylate cyclase (Feucht and Saier,  
110 1980). These include 2-deoxy-D-glucose (2DG) and methyl- $\alpha$ -D-glucoside ( $\alpha$ MG) (Saier et al.,  
111 1982). Here we show that incubation of wild type *E. coli* cells in glycerol media together with  
112 2DG or  $\alpha$ MG promotes *glpFK*-activating IS5 insertional events. To determine whether under  
113 these conditions IS5 mutants can accumulate and take over the population, we carried out long-  
114 term growth experiments. Our results are consistent with a scenario in which IS5 insertional  
115 activation of *glpFK* evolved in wild type cells as a mechanism to overcome adverse  
116 environmental conditions.

117

## 118 **Materials and Methods**

### 119 ***Bacterial Strains and Growth Conditions***

120 Strains and DNA oligonucleotides used in this study are described in Supplementary Tables 1  
121 and 2, respectively. The *cyaA* deletion mutant was generated from the parental strain (*E. coli* K-  
122 12 strain BW25113) using the method of Datsenko and Wanner (Datsenko and Wanner, 2000b).

123 Briefly, a kanamycin resistance gene (*km*), flanked by the FLP recognition site (FRT) was  
124 amplified from the template plasmid pKD4 using mutation oligos *cyaA1-P1* and *cyaA2-P2*  
125 (Supplementary Table 2), each of which is composed of a ~20 bp region at the 3' end that is  
126 complementary to the FRT-flanking *km* sequence, and a ~50 bp region at the 5' end that is  
127 homologous to *cyaA*. The PCR products were gel purified, treated with *DpnI*, and then  
128 electroporated into BW25113 cells expressing the lamada-Red proteins encoded by plasmid  
129 pKD46. The pKD46 plasmid, which carries a temperature-sensitive origin of replication, was  
130 removed by growing the mutant cells overnight at 40 °C. The Km<sup>r</sup> mutants were verified for the  
131 replacement of the target gene by the FRT-flanking *km* gene by PCR. The *km* gene was  
132 subsequently eliminated (leaving an 85-bp FRT sequence) using plasmid pCP20 that bears the  
133 FLP recombinase. The *cyaA glpR* double mutant was constructed by transferring a *km* insertional  
134 mutation of the *cyaA* gene into the *glpR* deletion mutant background (Zhang and Saier, 2009a)  
135 using P1 transduction.

136 To fuse the chloramphenicol-resistance gene (*cat*) with the *glpFK* operon, downstream of  
137 *glpK* in the chromosome, the plasmid pKD13-*cat* made previously (Zhang and Saier, 2009a),  
138 was used. In this plasmid, the *cat* gene is located upstream of a FRT-flanking *km* gene (Datsenko  
139 and Wanner, 2000b). The *cat* structural gene with its own ribosome binding site (RBS), together  
140 with its downstream *km* gene, was amplified from pKD13-*cat* using primers *glpFKcat1-P1* and  
141 *glpFKcat2-P2* (Supplementary Table 2). The PCR products were electroporated into wild type,  
142  $\Delta$ *cyaA* and  $\Delta$ *cyaA*  $\Delta$ *glpR* cells to replace the 85-bp downstream region between the 8<sup>th</sup> nucleotide  
143 and the 94<sup>th</sup> nucleotide relative to the *glpK* stop codon in the chromosome. After electroporation,  
144 the cells were selected on LB + Km agar plates. The Km<sup>r</sup> colonies were verified for the  
145 substitution of the 85 bp *glpK/glpA* intergenic region by PCR and subsequent DNA sequencing.

146 In the resultant strains (named BW\_Cat,  $\Delta$ *cyaA*\_Cat and  $\Delta$ *cyaA*  $\Delta$ *glpR*\_Cat, respectively), *glpF*,  
147 *glpK* and *cat* form a single operon with its expression solely under the control of the *glpFK*  
148 promoter (*PglpFK*).

149 Strains were cultured in LB, NB or minimal M9 media with various carbon sources at  
150 37°C or 30°C. When appropriate, kanamycin (Km; 25 µg/ml), ampicillin (Ap; 100 µg/ml), or  
151 chloramphenicol (Cm; 16-60 µg/ml) was added to the media.

### 152 ***Mutations of Chromosomal Crp Operators***

153 To modify the chromosomal Crp binding sites in the control region of the *glpFK* operon, the  
154 previously made plasmid pKD13-*PglpFK* (Zhang and Saier, 2009a), was used. In this plasmid,  
155 *PglpFK* and the FRT-flanking *km* gene were oriented in opposite directions. Using the quick-  
156 change site-directed mutagenesis kit (Agilent) and oligos *PglpFK*<sub>CrpI&II</sub>-F and *PglpFK*<sub>CrpI&II</sub>-R  
157 (Supplementary Table 2), both Crp operators (*O*<sub>CrpI</sub> and *O*<sub>CrpII</sub>) in the *glpFK* control region,  
158 contained within pKD13-*PglpFK*, were mutated by changing tatgacgaggcacacacattttaagt (-69 to  
159 -44 relative to +1 of *PglpFK*) to gacagcgaggcatctgcattttaatc (substitutions are underlined). The  
160 substitutions were confirmed by sequencing. Using the resultant plasmid, pKD13-  
161 *PglpFK*<sub>*O*CrpI&II</sub>, as template, the region containing the *km* gene and *PglpFK*<sub>*O*CrpI&II</sub> was PCR  
162 amplified using the primers *PglpFK*<sub>CrpI&II</sub>-P1 and *PglpFK*<sub>CrpI&II</sub>-P2 (Supplementary Table 2). The  
163 PCR products were integrated into the  $\Delta$ *cyaA* mutant chromosome to replace the wild type  
164 *PglpFK*. The nucleotide substitutions in both *O*<sub>CrpI</sub> and *O*<sub>CrpII</sub> operators were confirmed by  
165 sequencing. The *km* gene was removed, and the resultant strains were named  $\Delta$ *cyaA* *O*<sub>CrpI&II</sub>  
166 (Supplementary Table 1).

### 167 ***Glp<sup>+</sup> Mutation Assay Using a $\Delta$ *cyaA* Mutant Strain***



168 Using the  $\Delta cyaA$  deletion mutant, mutation to  $Glp^+$  was first measured on minimal M9 + 0.2%  
169 glycerol agar plates as described previously (Zhang and Saier, 2009a). Briefly, cells from an  
170 overnight LB culture were washed and inoculated onto plates ( $\sim 10^8$  cells/plate). The plates were  
171 then incubated in a 30 °C incubator and were examined daily for the appearance of  $Glp^+$  colonies  
172 with each colony representing a  $Glp^+$  mutation. On these glycerol minimal agar plates, any  
173 colonies appearing by day 2 were considered to be from  $Glp^+$  cells initially present when applied  
174 to the plates. They were therefore subtracted from the subsequent measurements. The total  
175 numbers of  $Glp^-$  cells were determined as described by Cairns and Foster (Cairns and Foster,  
176 1991). The  $Glp^+$  mutations were determined by counting the  $Glp^+$  colonies that appeared on the  
177 original agar plates. The frequencies of  $Glp^+$  mutations on glycerol M9 plates were determined  
178 by dividing the numbers of  $Glp^+$  colonies by the total  $Glp^-$  populations. To determine if any of  
179 the  $Glp^+$  colonies arose from  $Glp^+$  cells initially plated, the  $\Delta cyaA$  cells, together with small  
180 numbers of  $\Delta cyaA$   $Glp^+$  cells, were plated onto the same M9 + 0.2% glycerol plates. The plates  
181 were incubated and examined as above.

182 To determine the effect of cAMP on the frequency of IS5 insertion into the *glpFK*  
183 activating site, strain  $\Delta cyaA\_Cat$  (in which *glpF*, *glpK* and *cat* are fused in a single operon, see  
184 Supplementary Table 1) was used. This strain is sensitive to Cm at 8  $\mu\text{g/ml}$  while the same strain  
185 with the IS5 insertion ( $\Delta cyaA$   $Glp^+\_Cat$ ) is resistant to Cm at 16  $\mu\text{g/ml}$ . Preliminary experiments  
186 showed that all  $\Delta cyaA\_Cat$  cells resistant to Cm at 16  $\mu\text{g/ml}$  were due to IS5 insertion in front of  
187 *PglpFK*. To determine the effect of cAMP on IS5 insertion, an 8-h old culture from a single  
188  $\Delta cyaA\_Cat$  colony was diluted 1000 x into 5 ml LB  $\pm$  cAMP (0 to 5 mM) contained in 30 ml  
189 glass tubes (2.5 cm x 20 cm). The tubes were shaken at 250 rpm in a 30 °C water bath shaker.  
190 After 15 h, the cells were washed 1x (to remove residual cAMP) with carbon source-free M9

191 salts, serially diluted, and applied onto LB + glucose agar plates and LB + glucose + Cm agar  
192 plates. The plates were incubated at 37 °C for 15 to 18 h. Total populations and Glp<sup>+</sup> populations  
193 were determined based on numbers of colonies on LB + glucose plates and on LB + glucose +  
194 Cm plates, respectively. The frequencies of Glp<sup>+</sup> mutation were determined by the ratios of Cm<sup>r</sup>  
195 populations to total populations.

196 To determine if cAMP affects IS5 insertion into other chromosomal sites, we chose to  
197 analyze mutants resistant to Furazolidone (FZD) using  $\Delta$ *cyaA*\_Cat cells. First, step I mutants  
198 were isolated by spreading the cells onto nutrient broth (NB) agar plates with a low  
199 concentration (1 µg/ml) of FZD. The cells of a step I mutant were then applied onto the agar  
200 plates with higher concentrations (5-7.5 µg/ml) of FZD. The plates were incubated at 30 °C for  
201 36 h or above, and colonies obtained were examined for the presence of IS elements in the *nfsB*  
202 gene by PCR using oligos nfsB-ver-F and nfsB-ver-R (Supplementary Table 2). Among those  
203 mutants carrying IS elements, IS5 insertional mutants were determined by two rounds of PCR,  
204 using oligos IS5-ver-F / nfsB-ver-R and nfsB-ver-F / IS5-ver-F, respectively. The ratio of IS5  
205 mutants was calculated by dividing total IS mutant numbers by IS5 mutant numbers.

206 To establish the effects of mutations in the Crp operators in the *glpFK* control region on  
207 the appearance of Glp<sup>+</sup> IS5 insertional mutations, the  $\Delta$ *cyaA* *O*<sub>CrpI&II</sub>\_Cat cells with mutations in  
208 operators, *O*<sub>CrpI</sub> and *O*<sub>CrpII</sub>, were examined for the appearance of Glp<sup>+</sup> mutations in LB media  
209 with or without cAMP as described above. To determine the effect of loss of *glpR* on Glp<sup>+</sup>  
210 mutation frequency, the  $\Delta$ *cyaA*  $\Delta$ *glpR* double mutant was examined for Glp<sup>+</sup> mutations in liquid  
211 LB ± cAMP (0.1 mM) as compared to the single  $\Delta$ *cyaA* mutant as described above.

212 To determine the effect of *glpR* overexpression on the  $\text{Glp}^+$  mutations, the *glpR* structural  
213 gene was amplified from the wild type genomic DNA using primers *glpR*-KpnI and *glpR*-  
214 BamHI (Supplementary Table 2). The PCR products were digested with *KpnI* and *BamHI*, gel  
215 purified, and then ligated to the same sites of pZA31 (Lutz and Bujard, 1997), yielding pZA31-  
216 *glpR*, in which *glpR* is driven by a synthetic *tet* promoter (*Ptet*). The same plasmid carrying a  
217 random fragment (RF), pZA31-RF, served as a control (Levine et al., 2007a). To repress *Ptet*  
218 activity, the constitutively expressed *tetR* cassette, located at the *attB* site, was transferred to  
219  $\Delta\text{cyaA\_Cat}$  carrying pZA31-*glpR* from BW-RI (Levine et al., 2007b) by P1 transduction.  
220 Therefore, the expression of *glpR* could be induced by a tetracycline analog, chlorotetracycline  
221 (cTc). The resultant strain containing the *tetR* source and pZA31-*glpR* was tested for  $\text{Glp}^+$   
222 mutations in LB  $\pm$  0.1mM cAMP as described above. To induce expression of *glpR* in pZA31-  
223 *glpR*, cTc (250 ng/ml) was added to the medium.

224 To further demonstrate cAMP inhibitory effects on the appearance of IS5 insertional  
225 mutants, and the competitive abilities of the mutants under low cAMP conditions, we performed  
226 a long-term experiment by transferring cultures to new media at various intervals. To do this, an  
227 LB culture (10  $\mu$ l) of  $\Delta\text{cyaA\_Cat}$  was used to inoculate M9 + glycerol  $\pm$  cAMP (0 to 1 mM)  
228 media. Before the first transfer, every 12 h or so, the cultures were serially diluted onto LB +  
229 glucose plates for total population determination and onto LB + glucose + Cm plates for  $\text{Glp}^+$   
230 (IS5 insertion) mutant population determination. After 2 or 2.5 days, the cultures were 1000x  
231 diluted into new tubes with the same media. Then at one-day intervals, the cultures were 1000x  
232 diluted into fresh media. For each transfer, the total cells and the  $\text{Glp}^+$  mutant populations were  
233 determined.

234 ***IS5 Insertional Mutation Assay Using A Wild Type Background***

235 2-deoxyglucose (2DG) is a non-metabolizable glucose analog that reduces the level of  
236 cytoplasmic cAMP level when adding to the media (Saier, 1989). Preliminary experiments  
237 showed that *E. coli* cells are sensitive to this compound at 0.1%. To determine if IS5 insertion  
238 upstream of *PglpFK* occurred in a wild type background, BW\_Cat cells (Supplementary Table 1)  
239 were tested for IS5 insertion on M9 + glycerol (0.2%) + 2DG (0.13%) ± Cm (60 µg/ml) agar  
240 plates. The plates were incubated at 30 °C, and the colonies were examined for the presence of  
241 IS5 in the upstream *glpFK* operon control region by PCR followed by gel electrophoresis.

#### 242 ***Long Term Evolutionary Experiments.***

243 At least two types of mutations arose when BW\_Cat cells were incubated on M9 +  
244 glycerol + 2DG ± Cm agar plates, the IS5 insertional mutation and a non-IS5 mutation of  
245 unknown nature. To determine if the IS5 insertional mutants are more competitive than the non-  
246 IS5 insertional mutants, 10 µl of a fresh LB culture of BW\_CAT was used to inoculate 5 ml of  
247 M9 + glycerol (0.2%) + 2DG (0.13%) ± Cm (60 µg/ml) in 30 ml glass tubes. The tubes were  
248 incubated with shaking (250 rpm) in a 30 °C water bath shaker. After 2.5 days of incubation, the  
249 cultures (i.e., mutant cells resistant to 2DG and Cm) were 1000x diluted into new tubes with the  
250 same media. On every other day, the mutants were 1000x diluted into new tubes. For each  
251 transfer, the mutant cultures were serially diluted using carbon source-free M9 salts, and the 10<sup>5</sup>-  
252 fold and 10<sup>6</sup>-fold dilutions were applied onto M9 + glycerol + 2DG ± Cm agar plates before  
253 incubation at 37 °C. After 2 days, 100 colonies from each transfer were subjected to PCR and  
254 subsequent gel electrophoresis analyses to determine the percentages of IS5 insertion mutants to  
255 the total mutants. Note that the parental cells do not grow under these conditions.

#### 256 ***Chromosomal lacZ Fusions and β-Galactosidase Assays***

257 Using pKD13-*PglpFK* (Zhang and Saier, 2009a) and pKD13-*PglpFK\_O<sub>CrpI&II</sub>* (Supplementary  
258 Table 1) as templates, *PglpFK* (-204 to +66 relative to the transcriptional start site) and  
259 *PglpFK\_O<sub>CrpI&II</sub>* plus their upstream FRT-flanked *km<sup>r</sup>* gene were amplified using oligos  
260 *PglpFKz-P1* and *PglpFKz-P2* (Supplementary Table 2). Using the method of Datsenko and  
261 Wanner (Datsenko and Wanner, 2000a), the promoters plus the upstream *km<sup>r</sup>* gene (*km<sup>r</sup>:PglpFK*  
262 or *km<sup>r</sup>:PglpFK\_O<sub>CrpI&II</sub>*) were integrated into the chromosome to replace the *lacI* gene and the  
263 native *lac* promoter (including the 5' UTR of *lacZ*) of MG1655 deleted for *lacY* (Klumpp et al.,  
264 2009). This chromosomal replacement was confirmed by PCR and subsequent DNA sequencing  
265 analysis. The resultant strains are deleted for both *lacI* and *lacY*, but they carry the *lacZ* gene that  
266 is expressed under the control of *PglpFK* or *PglpFK\_O<sub>CrpI&II</sub>*. Both constructs were transferred  
267 into  $\Delta$ *cyaA* and  $\Delta$ *cyaA*  $\Delta$ *glpR* strains by P1 transduction, yielding  $\Delta$ *cyaA\_PglpFK-lacZ*,  
268  $\Delta$ *cyaA\_PglpFK\_O<sub>CrpI&II</sub>-lacZ*,  $\Delta$ *cyaA* $\Delta$ *glpR\_PglpFK-lacZ*, and  $\Delta$ *cyaA* $\Delta$ *glpR\_PglpFK\_O<sub>CrpI&II</sub>-lacZ*  
269 (Supplementary Table 1).

270 For  $\beta$ -galactosidase assays, strains were cultured in liquid LB media  $\pm$  1 mM cAMP at 30  
271 °C. When cultures entered the exponential phase, samples were collected for measurement of  $\beta$ -  
272 galactosidase activities as described by Miller (Miller, 1972).

273

## 274 **Results**

### 275 ***IS5 insertional activation of the glpFK operon occurs in $\Delta$ cyaA mutant cells***

276 We previously demonstrated that  $\Delta$ *crp* mutant cells of *E. coli* could regain the ability to  
277 utilize glycerol by IS5-mediated insertional mutations that specifically occurred at a single site,  
278 upstream of the *glpFK* promoter, preferentially in the presence of glycerol (Zhang and Saier,

279 2009a). In this study, we first used  $\Delta cyaA$  mutant cells lacking the cAMP biosynthetic enzyme,  
280 adenylate cyclase, Cya. Like the  $\Delta crp$  mutant cells, the  $\Delta cyaA$  mutant cells cannot utilize  
281 glycerol as the sole carbon source for growth. However, after a prolonged incubation on M9 +  
282 glycerol agar plates,  $Glp^+$  mutants could be observed (Figure 1). These mutants were IS5  
283 insertional mutants carrying IS5 in the same position and orientation upstream of the *glpFK*  
284 promoter as those isolated previously from  $\Delta crp$  cells. The time course (Figure 1) for their  
285 appearance and the properties of these double mutants were indistinguishable from those isolated  
286 previously (Zhang and Saier, 2009a). Among at least 100 independent  $Glp^+$  mutants analyzed, no  
287 other types of mutants arose under the conditions used. There was an approximately two-day  
288 delay before mutant colonies appeared, and these clearly arose during incubation on the plates,  
289 since when small numbers (e.g. 11 and 23) of identical  $\Delta cyaA$   $Glp^+$  insertional mutants were  
290 added to the  $\Delta cyaA$  cells prior to plating, they gave rise to colonies within a shorter time period  
291 (Figure 1).

### 292 ***IS5 activation of the *glpFK* operon in $\Delta cyaA$ cells is suppressed by exogenous cAMP***

293 Exogenous cAMP can enter cells to increase the cytoplasmic concentration of this  
294 nucleotide (Saier et al., 1982). Figure 2A shows the effect of increasing concentrations of  
295 external cAMP on the *glpFK*-specific IS5 insertional frequency in  $\Delta cyaA$  *glpFK\_cat* cells (see  
296 *Materials and Methods* and Supplementary Table 1). At a concentration of 10  $\mu$ M, exogenous  
297 cAMP had only a slight inhibitory effect on IS5 insertion, but at 100  $\mu$ M, cAMP inhibited over  
298 90%, whereas at 1 mM, cAMP essentially abolished IS5 insertion (Figure 2A).

299 To determine whether the decrease in IS5 insertion frequency due to the presence of  
300 cAMP was specific to the *glpFK* promoter, we analyzed IS5 insertion at the *nfsB* gene in  $\Delta cyaA$   
301 cells. Mutational inactivation of *nfsB* confers resistance to furazolidone (FZD) (Whiteway et al.,

302 1998), and a significant fraction of inactivating mutations are due to IS5 insertion (see *Materials*  
303 *and Methods*). As shown in Figure 2 B, cAMP did not influence the frequency of total  
304 insertional events (grey bars) or of IS5 insertional events (black bars) among FZD-resistant  
305 mutants within experimental error.

306 ***The effect of cAMP on IS5 insertion frequency requires Crp-binding sites in the glpFK***  
307 ***promoter***

308 To determine whether the inhibition of IS5 insertion upstream of the *glpFK* promoter by  
309 cAMP is due to the binding of the cAMP-Crp complex to the two adjacent Crp binding sites  
310 ( $O_{CrpI}$  and  $O_{CrpII}$ ), present in the *glpFK* promoter, we analyzed the consequences of point  
311 mutations within these binding sites. These mutations essentially abolished the inhibitory effect  
312 of Crp on IS5 insertion (Figure 3A). Although these Crp operator mutations eliminated binding  
313 of the cAMP-Crp complex, they did not change the *glpFK* promoter strength in the *cyaA* deletion  
314 background, and the promoter activity was still under the control of GlpR (Figure 3B). Thus, it  
315 can be concluded that inhibition by cAMP-Crp of IS5 insertion into the *glpFK* activating site is  
316 due to the binding of the cAMP-Crp complex solely to these two operators present in the *glpFK*  
317 promoter region.

318 ***Crp and GlpR independently affect IS5 insertion upstream of the glpFK promoter***

319 To determine if GlpR plays a role in the inhibitory effect of Crp on IS5 insertion, we  
320 deleted the *glpR* gene in the  $\Delta cyaA$  background, yielding a  $\Delta cyaA \Delta glpR$  double mutant  
321 (Supplementary Table 1). Higher IS5 insertional frequencies were observed in the  $\Delta cyaA \Delta glpR$   
322 cells than in the  $\Delta cyaA$  cells when grown in LB (no glycerol added) (Figure 4A). However, in  
323 the absence of GlpR, cAMP still exerted its inhibiting effect, presumably by binding to Crp,

324 which then bound to its two *glpFK* operon binding sites,  $O_{CrpI}$  and  $O_{CrpII}$  (compare column 2 and  
325 column 4 in Figure 4A). Comparable inhibition was observed regardless of the presence of  
326 glycerol or GlpR. It was therefore concluded that regulation of IS5 insertion by the cAMP-Crp  
327 complex occurs independently of glycerol and GlpR.

328         When GlpR was over-produced in the absence of cAMP, GlpR still exerted its strong  
329 inhibitory effect (Figure 4B). In the left panel, the *glpR* gene was expressed at an extremely low  
330 level, and GlpR exerted only a minimal effect because chlorotetracycline (cTc), the inducer, was  
331 not present. When the cTc concentration was high (250 ng/ml), *glpR* was expressed at a high  
332 level, and the rate of IS5 insertion into the *glpFK* upstream site was greatly reduced (see right  
333 panel of Figure 4b). The same experiments were conducted in the presence of cAMP (0.1mM).  
334 The IS5 insertion frequency decreased, while overexpression of GlpR further inhibited IS5  
335 insertion (data not shown). These results suggest that GlpR and the cAMP-Crp complex exert  
336 their effects on IS5 insertion independently of each other. These experiments also provide  
337 evidence that that GlpR and the cAMP-Crp complex can bind to the *glpFK* control region  
338 simultaneously.

339 ***IS5 insertional activation of the *glpFK* operon occurs in a wild type background in the***  
340 ***presence of 2-deoxyglucose***

341         Since a reduction in cAMP promotes IS5 insertion in the *glpFK* activating site, we sought  
342 to determine whether environmental conditions that could lead to a reduction in cAMP  
343 concentrations could elevate IS5 insertion into the *glpFK* promoter. Non-metabolizable glucose  
344 analogues, such as 2-deoxyglucose (2DG) and  $\alpha$ -methylglucoside ( $\alpha$ MG), (He and Liu, 2002,  
345 Holst and Williamson, 2004, Kumar et al., 2013, Moller, 2010, Tantanarat et al., 2012, Saier and  
346 Ballou, 1968, Xi et al., 2014) are known to lower cytoplasmic cAMP levels by inhibiting



347 adenylate cyclase activity (Gabor et al., 2011, Gershanovich, 2003, Saier et al., 1996,  
348 Vastermark and Saier, 2014). These analogues also strongly inhibit growth on glycerol, at least  
349 in part due to inhibition of both cytoplasmic cAMP production by adenylate cyclase, and of  
350 cytoplasmic glycerol-3-phosphate (substrate/inducer ) production by glycerol kinase (Kuroda et  
351 al., 2001, Peterkofsky et al., 2001, Schlegel et al., 2002, Saier and Reizer, 1994). We therefore  
352 asked if we could isolate IS5 insertional mutants in a wild-type background on minimal M9 agar  
353 plates containing glycerol, inhibitory concentrations of 2DG or  $\alpha$ MG and chloramphenicol. The  
354 results for  $\alpha$ MG proved to be same as for 2DG, and consequently, only those obtained with 2DG  
355 are presented here.

356 In these experiments, a *glpFK-cat* (chloramphenicol acetyl transferase) fusion was used  
357 to measure IS5 insertion (see Supplementary Table 1 and *Materials and Methods*). Regardless of  
358 the inhibitory glucose analogue used, 2DG/ $\alpha$ MG, resistant ( $2DG^r$ / $\alpha$ MG $^r$ ) mutants (which were  
359 also Glp $^+$ ) could be isolated in a wild type *E. coli* genetic background (Jones-Mortimer and  
360 Kornberg, 1980, Kornberg et al., 2000, Rephaeli and Saier, 1980). As shown in Figure 5, PCR  
361 analyses of colonies that appeared after a five-day incubation at 30°C revealed two types of Glp $^+$   
362 mutants: (i) a majority that did not have an insertion in the *glpFK* promoter (dubbed “non-IS5  
363 mutants” here), and (ii) a minority (<10%; “IS5 mutants”) that had IS5 inserted into the *glpFK*  
364 promoter-activating site.

365 Sequencing revealed that the non-IS5 insertion mutants did not have genetic alterations  
366 in the *glpFK* operon, or in the *fruR* gene [which appears to regulate *crp* gene expression (Zhang  
367 et al., 2014)]. Unlike IS5 insertional mutants, the non-IS5 mutants showed a pleiotropic  
368 phenotype in addition to their increased growth in a glycerol + 2DG medium, such as poor  
369 utilization of sorbitol (D-glucitol) and succinate (Table 1) which are utilized efficiently only

370 when high cytoplasmic concentrations of the cAMP-Crp complex are available (Zhang et al.,  
371 2014).

372 To demonstrate that the Glp<sup>+</sup> phenotype of IS5 mutants results solely from the IS5  
373 insertional event, we carried out P1 transduction experiments to determine if the phenotypes of  
374 2DG<sup>r</sup>, Cm<sup>r</sup> and Glp<sup>+</sup>, could be transferred together into another *E. coli* genetic background. In  
375 these experiments, we used two “wild type” strains, BW25113 and BW\_Cat (Supplementary  
376 Table 1) (with or without the *glpFK-cat* fusion), as recipients. For both recipient strains,  
377 transductants were obtained using the IS5 insertional mutant (expressing the fused *glpFK\_cat*  
378 operon) as donor, when plated on M9 + glycerol + 2DG ± Cm agar plates. The regulatory  
379 regions of 23 independently isolated transductants were amplified by PCR, and all were found to  
380 carry the IS5 element. DNA sequencing showed that IS5 was located in the same position and in  
381 the same orientation as described previously (Zhang and Saier, 2009a, Zhang and Saier, 2009c)).  
382 These results showed that in these mutants, IS5 insertion is necessary and sufficient to give rise  
383 to the 2DG<sup>r</sup> Glp<sup>+</sup> phenotype.

384 ***Short-term and long-term evolution experiments to evaluate if IS5-mediated activation***  
385 ***of glpFK operon expression could have evolved in wild type cells***

386 Initially, we conducted short term evolutionary experiments (several transfers) using the  
387  $\Delta$ *cyaA* strain in the presence of glycerol as sole carbon source (Figure 6A), glycerol plus 0.1 mM  
388 cAMP (Figure 6B), and glycerol plus 1.0 mM cAMP (Figure 6C). In the absence of cAMP, IS5  
389 insertional mutants appeared as the only species after 37 h of incubation with shaking. After  
390 several transfers, virtually 100% of the cells contained IS5 in the *glpFK*-activating site (Figure  
391 6A). When cAMP was added at 0.1 mM, IS5 insertional mutants again appeared as the only  
392 species after a 61 h incubation with shaking. After the first transfer, virtually all cells contained

393 IS5 (Figure 6B). When exogenous cAMP was added at 1 mM, the appearance of these mutants  
394 was strongly inhibited. As a result, after the 6th transfer, only about 20% of the population were  
395 IS5 insertional mutants (Figure 6C). These observations are consistent with the conclusion that  
396 cAMP-Crp complex inhibits IS5 insertion upstream of the *glpFK* operon.

397 In order to conduct long-term evolutionary experiments in a wild type background, we  
398 used *glpFK\_cat* cells in which a chloramphenicol-resistance gene was transcriptionally fused to  
399 the *glpFK* operon in wild type cells such that *glpFK* activation by IS5 insertion led  
400 simultaneously to a Glp<sup>+</sup> as well as a Cm<sup>r</sup> phenotype (see *Materials and Methods*). Prolonged  
401 incubation of *glpFK\_cat* wild type cells under conditions analogous to those described above for  
402 the short-term  $\Delta$ *cyaA* experiments revealed that, IS5 mutants became an appreciable fraction of  
403 the population after several generations in minimal glycerol medium with 2-deoxyglucose, with  
404 (Figure 7A) or without (Figure 7B) chloramphenicol. When chloramphenicol was present, IS5  
405 insertional mutants first appeared after six transfers, and then continued to accumulate during the  
406 remainder of the experiment (17 transfers) at the end of which about 25% of the cells bore the  
407 IS5 insertion (Figure 7A). When chloramphenicol was absent, it took a little longer; insertional  
408 mutants became appreciable following the eighth transfer, and accounted for over 20% of the  
409 cells after 20 transfers (Figure 7B). These experiments show that *glpFK* activation by IS5 is  
410 advantageous when wild type cells are exposed to glycerol in the presence of a sugar analogue  
411 inhibitor of adenylate cyclase such as 2-deoxyglucose (Novotny et al., 1985). Thus, the process  
412 we had previously described in  $\Delta$ *crp* and  $\Delta$ *cyaA* mutants could have evolved in wild type cells in  
413 response to specific environmental conditions.

414

415

## 416 **Discussion**

417 Transposons (transposable elements; jumping genes) were first described by Barbara  
418 McClintock (McClintock, 1950), recipient of the 1983 Nobel Prize (Kenez, 1984, van de Putte,  
419 1983). Initially identified in corn, transposable elements occur in virtually all living organisms,  
420 where they cause mutations that can inactivate genes, activate genes, and mediate chromosomal  
421 rearrangements (Zhang and Saier, 2011). Different types of transposons (especially  
422 retrotransposons) comprise about 30% of the human genome (Cordaux and Batzer, 2009). Why  
423 are they ubiquitous, and what are their primary functions? What is responsible for their broad  
424 occurrence in genomes of all types of living organisms? The answers to these questions are not  
425 yet in hand, but it is clear that transposons contribute to genomic instability and genetic  
426 innovation (Huang et al., 2012).

427 Long-terminal-repeat (LTR) retrotransposons are known to jump around within  
428 eukaryotic genomes (Curcio et al., 2015). To avoid damaging resident genes, they have been  
429 selected to integrate away from protein-coding sequences. For instance, the fission yeast LTR  
430 retrotransposon, Tf1, inserts at nucleosome-free regions in gene promoters. Jacobs et al. (Jacobs  
431 et al., 2015) recently showed that Tf1 is directed to these insertion sites by specific DNA binding  
432 proteins such as Sap1, a situation that parallels in some respects the observations reported here.  
433 Thus, regulation of transposon insertion by DNA-binding proteins may prove to be common in  
434 Nature, perhaps even ubiquitous.

435 Adaptive mutation, the genome-wide acceleration of mutation rate under stress  
436 conditions, is well-documented, and in some cases, the mechanisms involved are understood  
437 (Shee et al., 2011). An understanding of the basis for mutations that increase fitness, give rise to  
438 drug resistance, and enable the emergence of pathological traits in microorganisms, are also

439 relevant to human, animal and plant health, at both the individual and the population levels  
440 (Gordo et al., 2011).

441 Over the last several decades, a number of mechanisms that accelerate mutagenesis under  
442 stressful conditions have been described. Among these have been those that activate cyptic  
443 operons by transposon insertion under starvation conditions where such activation is beneficial to  
444 the cell (Hall, 1999). Another example is provided by enhanced IS insertional mutations causing  
445 metal resistance in bacterial cells subjected to toxic levels of zinc (Vandecraen et al., 2016). The  
446 activation of the *glpFK* operon by IS5 insertion represents an adaptive mutagenic mechanism  
447 where some, but not all, molecular mechanisms leading to the activation of the operon are  
448 understood (Zhang and Saier, 2009b, Zhang and Saier, 2009d). In this paper we advance the  
449 state of knowledge of this system by showing that transposition into the upstream promoter  
450 region of *glpFK* is controlled independently by two defined DNA binding proteins (GlpR and the  
451 Crp-cAMP-Crp complex). We show that IS5 insertion into the *glpFK* promoter can be regulated  
452 by exposure to environmental toxic sugar analogues, and propose that such exposure may  
453 constitute a selective environment that favored the evolution of a gene activation mechanism that  
454 requires a specific transposition event.

455 In our experiments with wild type *E. coli* cells, we used 2-deoxyglucose (2DG) as  
456 described in this report or methyl  $\alpha$ -glucoside ( $\alpha$ MG) (data not presented) to lower cytoplasmic  
457 cAMP levels and to inhibit glycerol utilization (Saier, 1998, Saier, 1989, Saier, 2001, Saier et al.,  
458 1995). But are comparable non-metabolizable glucose analogues found in Nature? In fact,  
459 numerous toxic and non-metabolizable sugar analogues are synthesized by microorganisms,  
460 plants, fungi and man. They include deoxy sugars such as 2-deoxyglucose, methylated sugars,  
461 such as 3- and 6-0 methyl glucose, fluoro sugars and a variety of  $\alpha$ - and  $\beta$ -glycosides such as

462 methyl  $\alpha$ -glucoside (He and Liu, 2002, Holst and Williamson, 2004, Kumar et al., 2013, Moller,  
463 2010, Tantanarat et al., 2012, Saier and Ballou, 1968, Xi et al., 2014). Thus, the conditions that  
464 promote IS5 hopping into the *glpFK*-activating site could have evolved under the pressures of  
465 natural selection. Supporting a possible evolutionary role for transposition under starvation  
466 conditions, it was recently reported that prolonged starvation leads to significantly elevated  
467 expression of transposases in *E. coli*, including the *insA* gene, encoding the IS5 transposase  
468 (Arunasri et al., 2014).

469

470

## 471 **Concluding Remarks**

472 We have shown that the IS5-mediated *glpFK*-activating insertional site is a conditional  
473 transposition hotspot. It is an insertional hotspot in low cyclic AMP and high glycerol, but  
474 insertion at this site is essentially undetectable in the presence of other carbon sources, or high  
475 levels of cyclic AMP in the absence of glycerol. The experimentation described in this  
476 report explains the effect of cAMP for the first time, and provides plausible conditions under  
477 which such a mutational mechanism could have evolved in a wild type genetic background.  
478 Thus, our results demonstrate that the activated cAMP-Crp complex strongly inhibits IS5 hopping  
479 into the *glpFK* activating site when bound to its DNA-binding sites in the upstream *glpFK*-  
480 promoter region. Our results also showed definitively that in the lab, one can isolate these  
481 activating mutants in a wild type genetic background in the presence of glycerol and inhibitory  
482 concentrations of 2DG or  $\alpha$ -MG that represent adverse environmental conditions.

483

484

## 485 **Acknowledgements**

486 We thank Fengyi Tang, Joshua Asiaban, Sabrina Phan and Yongxin Hu for assistance  
487 with manuscript preparation, and Chika Kukita and Robert Palido for technical assistance with  
488 some of the experiments. This work was supported by NIH grants GM109895 and GM077402.

489

## 490 **Conflict of Interest**

491 The authors declare no conflict of interest.

492

493

## 494 **References**

- 495 ARUNASRI, K., ADIL, M., KHAN, P. A. & SHIVAJI, S. 2014. Global gene expression analysis  
496 of long-term stationary phase effects in *E. coli* K12 MG1655. *PLoS One*, 9, e96701.
- 497 CAIRNS, J. & FOSTER, P. L. 1991. Adaptive reversion of a frameshift mutation in *Escherichia*  
498 *coli*. *Genetics*, 128, 695-701.
- 499 CHENG, K. K., LEE, B. S., MASUDA, T., ITO, T., IKEDA, K., HIRAYAMA, A., DENG, L.,  
500 DONG, J., SHIMIZU, K., SOGA, T., TOMITA, M., PALSSON, B. O. & ROBERT, M.  
501 2014. Global metabolic network reorganization by adaptive mutations allows fast growth  
502 of *Escherichia coli* on glycerol. *Nature communications*, 5, 3233.
- 503 CORDAUX, R. & BATZER, M. A. 2009. The impact of retrotransposons on human genome  
504 evolution. *Nature reviews. Genetics*, 10, 691-703.
- 505 CURCIO, M. J., LUTZ, S. & LESAGE, P. 2015. The Ty1 LTR-Retrotransposon of Budding  
506 Yeast, *Saccharomyces cerevisiae*. *Microbiol Spectr*, 3, MDNA3-0053-2014.

- 507 DATSENKO, K. A. & WANNER, B. L. 2000a. One-step inactivation of chromosomal genes in  
508 *Escherichia coli* K-12 using PCR products. *Proc Natl Acad Sci U S A*, 97, 6640-5.
- 509 DATSENKO, K. A. & WANNER, B. L. 2000b. One-step inactivation of chromosomal genes in  
510 *Escherichia coli* K-12 using PCR products. *Proceedings of the National Academy of*  
511 *Sciences of the United States of America*, 97, 6640-5.
- 512 FEUCHT, B. U. & SAIER, M. H., JR. 1980. Fine control of adenylate cyclase by the  
513 phosphoenolpyruvate:sugar phosphotransferase systems in *Escherichia coli* and  
514 *Salmonella typhimurium*. *Journal of bacteriology*, 141, 603-10.
- 515 FIC, E., BONAREK, P., GORECKI, A., KEDRACKA-KROK, S., MIKOLAJCZAK, J., POLIT,  
516 A., TWORZYDLO, M., DZIEDZICKA-WASYLEWSKA, M. & WASYLEWSKI, Z.  
517 2009. cAMP receptor protein from *Escherichia coli* as a model of signal transduction in  
518 proteins--a review. *Journal of molecular microbiology and biotechnology*, 17, 1-11.
- 519 GABOR, E., GOHLER, A. K., KOSFELD, A., STAAB, A., KREMLING, A. & JAHREIS, K.  
520 2011. The phosphoenolpyruvate-dependent glucose-phosphotransferase system from  
521 *Escherichia coli* K-12 as the center of a network regulating carbohydrate flux in the cell.  
522 *Eur J Cell Biol*, 90, 711-20.
- 523 GANCEDO, J. M. 2013. Biological roles of cAMP: variations on a theme in the different  
524 kingdoms of life. *Biological reviews of the Cambridge Philosophical Society*, 88, 645-68.
- 525 GERSHANOVICH, V. N. 2003. [Pleiotropic function of phosphoenolpyruvate-dependent  
526 phosphotransferase system in bacteria. Report 1]. *Mol Gen Mikrobiol Virusol*, 14-26.
- 527 GORDO, I., PERFEITO, L. & SOUSA, A. 2011. Fitness effects of mutations in bacteria.  
528 *Journal of molecular microbiology and biotechnology*, 21, 20-35.



- 529 HALL, B. G. 1999. Transposable elements as activators of cryptic genes in *E. coli*. *Genetica*,  
530 107, 181-7.
- 531 HE, X. M. & LIU, H. W. 2002. Formation of unusual sugars: mechanistic studies and  
532 biosynthetic applications. *Annual review of biochemistry*, 71, 701-54.
- 533 HERRING, C. D., RAGHUNATHAN, A., HONISCH, C., PATEL, T., APPLEBEE, M. K.,  
534 JOYCE, A. R., ALBERT, T. J., BLATTNER, F. R., VAN DEN BOOM, D., CANTOR,  
535 C. R. & PALSSON, B. O. 2006. Comparative genome sequencing of *Escherichia coli*  
536 allows observation of bacterial evolution on a laboratory timescale. *Nature genetics*, 38,  
537 1406-12.
- 538 HOLST, B. & WILLIAMSON, G. 2004. A critical review of the bioavailability of glucosinolates  
539 and related compounds. *Natural product reports*, 21, 425-47.
- 540 HUANG, C. R., BURNS, K. H. & BOEKE, J. D. 2012. Active transposition in genomes. *Annual*  
541 *review of genetics*, 46, 651-75.
- 542 JACOBS, J. Z., ROSADO-LUGO, J. D., CRANZ-MILEVA, S., CICCAGLIONE, K. M.,  
543 TOURNIER, V. & ZARATIEGUI, M. 2015. Arrested replication forks guide  
544 retrotransposon integration. *Science*, 349, 1549-53.
- 545 JONES-MORTIMER, M. C. & KORNBERG, H. L. 1980. Amino-sugar transport systems of  
546 *Escherichia coli* K12. *Journal of general microbiology*, 117, 369-76.
- 547 KENEZ, J. 1984. [B. McClintock, winner of the 1983 Nobel prize for medicine]. *Orvosi hetilap*,  
548 125, 593-4.
- 549 KLUMPP, S., ZHANG, Z. & HWA, T. 2009. Growth rate-dependent global effects on gene  
550 expression in bacteria. *Cell*, 139, 1366-75.

- 551 KORNBERG, H. L., LAMBOURNE, L. T. & SPROUL, A. A. 2000. Facilitated diffusion of  
552 fructose via the phosphoenolpyruvate/glucose phosphotransferase system of *Escherichia*  
553 *coli*. *Proceedings of the National Academy of Sciences of the United States of America*,  
554 97, 1808-12.
- 555 KUMAR, A., DE, T., MISHRA, A. & MISHRA, A. K. 2013. Oleandrin: A cardiac glycosides  
556 with potent cytotoxicity. *Pharmacognosy reviews*, 7, 131-9.
- 557 KURODA, M., WILSON, T. H. & TSUCHIYA, T. 2001. Regulation of galactoside transport by  
558 the PTS. *J Mol Microbiol Biotechnol*, 3, 381-4.
- 559 LEVINE, E., ZHANG, Z., KUHLMAN, T. & HWA, T. 2007a. Quantitative characteristics of  
560 gene regulation by small RNA. *PLoS Biol*, 5, e229.
- 561 LEVINE, E., ZHANG, Z., KUHLMAN, T. & HWA, T. 2007b. Quantitative characteristics of  
562 gene regulation by small RNA. *PLoS biology*, 5, e229.
- 563 LIN, E. C. 1976. Glycerol dissimilation and its regulation in bacteria. *Annual review of*  
564 *microbiology*, 30, 535-78.
- 565 LUTZ, R. & BUJARD, H. 1997. Independent and tight regulation of transcriptional units in  
566 *Escherichia coli* via the LacR/O, the TetR/O and AraC/I1-I2 regulatory elements. *Nucleic*  
567 *acids research*, 25, 1203-10.
- 568 MCCLINTOCK, B. 1950. The origin and behavior of mutable loci in maize. *Proc Natl Acad Sci*  
569 *U S A*, 36, 344-55.
- 570 MILLER, J. H. 1972. *Experiments in molecular genetics*, Cold Spring Harbor, N.Y., Cold Spring  
571 Harbor Laboratory.
- 572 MOLLER, B. L. 2010. Functional diversifications of cyanogenic glucosides. *Current opinion in*  
573 *plant biology*, 13, 338-47.

- 574 NOVOTNY, M. J., FREDERICKSON, W. L., WAYGOOD, E. B. & SAIER, M. H., JR. 1985.  
575 Allosteric regulation of glycerol kinase by enzyme III<sub>glc</sub> of the phosphotransferase  
576 system in *Escherichia coli* and *Salmonella typhimurium*. *Journal of bacteriology*, 162,  
577 810-6.
- 578 PETERKOFISKY, A., WANG, G., GARRETT, D. S., LEE, B. R., SEOK, Y. J. & CLORE, G.  
579 M. 2001. Three-dimensional structures of protein-protein complexes in the *E. coli* PTS. *J*  
580 *Mol Microbiol Biotechnol*, 3, 347-54.
- 581 REPHAELI, A. W. & SAIER, M. H., JR. 1980. Substrate specificity and kinetic characterization  
582 of sugar uptake and phosphorylation, catalyzed by the mannose enzyme II of the  
583 phosphotransferase system in *Salmonella typhimurium*. *The Journal of biological*  
584 *chemistry*, 255, 8585-91.
- 585 SAIER, M. H., JR. 1989. Protein phosphorylation and allosteric control of inducer exclusion and  
586 catabolite repression by the bacterial phosphoenolpyruvate: sugar phosphotransferase  
587 system. *Microbiol Rev*, 53, 109-20.
- 588 SAIER, M. H., JR. 1998. Multiple mechanisms controlling carbon metabolism in bacteria.  
589 *Biotechnol Bioeng*, 58, 170-4.
- 590 SAIER, M. H., JR. 2001. The bacterial phosphotransferase system: structure, function, regulation  
591 and evolution. *J Mol Microbiol Biotechnol*, 3, 325-7.
- 592 SAIER, M. H., JR. & BALLOU, C. E. 1968. The 6-O-methylglucose-containing  
593 lipopolysaccharide of *Mycobacterium phlei*. Identification of D-glyceric acid and 3-O-  
594 methyl-D-glucose in the polysaccharide. *J Biol Chem*, 243, 992-1005.

- 595 SAIER, M. H., JR., CHAUVAUX, S., COOK, G. M., DEUTSCHER, J., PAULSEN, I. T.,  
596 REIZER, J. & YE, J. J. 1996. Catabolite repression and inducer control in Gram-positive  
597 bacteria. *Microbiology*, 142 ( Pt 2), 217-30.
- 598 SAIER, M. H., JR., CHAUVAUX, S., DEUTSCHER, J., REIZER, J. & YE, J. J. 1995. Protein  
599 phosphorylation and regulation of carbon metabolism in gram-negative versus gram-  
600 positive bacteria. *Trends Biochem Sci*, 20, 267-71.
- 601 SAIER, M. H., JR., KEELER, D. K. & FEUCHT, B. U. 1982. Physiological desensitization of  
602 carbohydrate permeases and adenylate cyclase to regulation by the  
603 phosphoenolpyruvate:sugar phosphotransferase system in *Escherichia coli* and  
604 *Salmonella typhimurium*. Involvement of adenosine cyclic 3',5'-phosphate and inducer.  
605 *The Journal of biological chemistry*, 257, 2509-17.
- 606 SAIER, M. H., JR. & REIZER, J. 1994. The bacterial phosphotransferase system: new frontiers  
607 30 years later. *Mol Microbiol*, 13, 755-64.
- 608 SCHLEGEL, A., BOHM, A., LEE, S. J., PEIST, R., DECKER, K. & BOOS, W. 2002. Network  
609 regulation of the *Escherichia coli* maltose system. *J Mol Microbiol Biotechnol*, 4, 301-7.
- 610 SHEE, C., PONDER, R., GIBSON, J. L. & ROSENBERG, S. M. 2011. What limits the  
611 efficiency of double-strand break-dependent stress-induced mutation in *Escherichia coli*?  
612 *Journal of molecular microbiology and biotechnology*, 21, 8-19.
- 613 SOUSA, A., BOURGARD, C., WAHL, L. M. & GORDO, I. 2013. Rates of transposition in  
614 *Escherichia coli*. *Biology letters*, 9, 20130838.
- 615 TANTANARAT, K., REJZEK, M., O'NEILL, E., RUZANSKI, C., HILL, L., FAIRHURST, S.  
616 A., LIMPASENI, T. & FIELD, R. A. 2012. An expedient enzymatic route to isomeric 2-,  
617 3- and 6-monodeoxy-monofluoro-maltose derivatives. *Carbohydrate research*, 358, 12-8.

- 618 VAN DE PUTTE, P. 1983. [The Nobel Prize for Medicine 1983 for B. McClintock; from  
619 controlling elements in corn to the activation of oncogenes]. *Nederlands tijdschrift voor*  
620 *geneeskunde*, 127, 2401-3.
- 621 VANDECRAEN, J., MONSIEURS, P., MERGEAY, M., LEYS, N., AERTSEN, A. & VAN  
622 HOUDT, R. 2016. Zinc-Induced Transposition of Insertion Sequence Elements  
623 Contributes to Increased Adaptability of *Cupriavidus metallidurans*. *Frontiers in*  
624 *Microbiology*, 7.
- 625 VASTERMARK, A. & SAIER, M. H., JR. 2014. The involvement of transport proteins in  
626 transcriptional and metabolic regulation. *Curr Opin Microbiol*, 18, 8-15.
- 627 WANG, X. & WOOD, T. K. 2011. IS5 inserts upstream of the master motility operon *flhDC* in a  
628 quasi-Lamarckian way. *The ISME journal*, 5, 1517-25.
- 629 WEISSENBORN, D. L., WITTEKINDT, N. & LARSON, T. J. 1992. Structure and regulation of  
630 the *glpFK* operon encoding glycerol diffusion facilitator and glycerol kinase of  
631 *Escherichia coli* K-12. *J Biol Chem*, 267, 6122-31.
- 632 WHITEWAY, J., KOZIARZ, P., VEALL, J., SANDHU, N., KUMAR, P., HOECHER, B. &  
633 LAMBERT, I. B. 1998. Oxygen-insensitive nitroreductases: analysis of the roles of *nfsA*  
634 and *nfsB* in development of resistance to 5-nitrofur derivatives in *Escherichia coli*.  
635 *Journal of bacteriology*, 180, 5529-39.
- 636 WON, H. S., LEE, Y. S., LEE, S. H. & LEE, B. J. 2009. Structural overview on the allosteric  
637 activation of cyclic AMP receptor protein. *Biochimica et biophysica acta*, 1794, 1299-  
638 308.
- 639 XI, H., KURTOGLU, M. & LAMPIDIS, T. J. 2014. The wonders of 2-deoxy-D-glucose.  
640 *IUBMB life*, 66, 110-21.

- 641 ZHANG, Z., ABOULWAFI, M. & SAIER, M. H. 2014. Regulation of *crp* Gene Expression by  
642 the Catabolite Repressor/Activator, Cra, in *Escherichia coli*. *Journal of molecular*  
643 *microbiology and biotechnology*, 24, 135-141.
- 644 ZHANG, Z. & SAIER, M. H., JR. 2009a. A mechanism of transposon-mediated directed  
645 mutation. *Molecular microbiology*, 74, 29-43.
- 646 ZHANG, Z. & SAIER, M. H., JR. 2009b. A mechanism of transposon-mediated directed  
647 mutation. *Mol Microbiol*, 74, 29-43.
- 648 ZHANG, Z. & SAIER, M. H., JR. 2009c. A novel mechanism of transposon-mediated gene  
649 activation. *PLoS genetics*, 5, e1000689.
- 650 ZHANG, Z. & SAIER, M. H., JR. 2009d. A novel mechanism of transposon-mediated gene  
651 activation. *PLoS Genet*, 5, e1000689.
- 652 ZHANG, Z. & SAIER, M. H., JR. 2011. Transposon-mediated adaptive and directed mutations  
653 and their potential evolutionary benefits. *Journal of molecular microbiology and*  
654 *biotechnology*, 21, 59-70.
- 655 ZHANG, Z., WANG, J., SHLYKOV, M. & SAIER, M., JR. 2013. Transposon Mutagenesis in  
656 Disease, Drug Discovery, and Bacterial Evolution. In: MITTELMAN, D. (ed.) *Stress-*  
657 *Induced Mutagenesis*. Springer New York.
- 658 ZHANG, Z., YEN, M. R. & SAIER, M. H., JR. 2010. Precise excision of IS5 from the intergenic  
659 region between the *fucPIK* and the *fucAO* operons and mutational control of *fucPIK*  
660 operon expression in *Escherichia coli*. *Journal of bacteriology*, 192, 2013-9.
- 661
- 662
- 663

664 **Figure legends**

665 **Figure 1. Glp<sup>+</sup> mutations in  $\Delta$ *cyaA* cells on M9 + glycerol agar plates.**  $\Delta$ *cyaA* cells ( $\sim 10^8$ )  
666 from a fresh LB culture were spread on M9 + glycerol (0.2%) agar plates. The plates were  
667 incubated at 30°C and examined for the appearance of Glp<sup>+</sup> colonies (each colony represents an  
668 IS5 insertional mutation) at 24-h intervals. The mutation frequencies were determined as in  
669 Zhang and Saier (Zhang and Saier, 2009a).  $\blacklozenge$  = no Glp<sup>+</sup> cells added before initially plating;  $\blacksquare$   
670 and  $\blacktriangle$  = 11 and 23 Glp<sup>+</sup> cells were included before plating.

671 **Figure 2. Effects of cAMP on (A) IS5 insertion upstream of the *glpFK* regulatory region in**  
672  **$\Delta$ *cyaA* cells, and (B) in the *nfsB* gene as a control.** In A, a fresh LB culture from a single  
673  $\Delta$ *cyaA*-Cat (see Supplementary Table 1) colony was diluted 1000 x into 5 ml of LB  $\pm$  cAMP (0  
674 to 5 mM) in 30 ml glass tubes (2.5 cm x 20 cm). The tubes were shaken at 250 rpm in a 30 °C  
675 water bath shaker. After  $\sim$ 15 h, the cells were washed 1x (to remove residual cAMP) with carbon  
676 source-free M9 salts, serially diluted, and applied onto LB + glucose agar plates (for total  
677 population determination) and LB + glucose + Cm (16  $\mu$ g/ml) agar plates (for IS5 insertional  
678 mutant population determination). In B, the cells ( $\sim 2 \times 10^8$ ) of a step I furazolidone (FZD)  
679 resistant (FZD<sup>r</sup>) mutant strain isolated from a  $\Delta$ *cyaA*-Cat strain, were applied to nutrient broth  
680 (NB) agar plates, with furazolidone (5 or 7.5  $\mu$ g/ml)  $\pm$  cAMP (1mM). The plates were incubated  
681 at 30 °C for 36 h before being examined for the appearance of FZD<sup>r</sup> mutants. Among these FZD<sup>r</sup>  
682 mutants, IS5 or other IS insertional mutants in the *nfsB* gene were determined by PCR (see  
683 Materials and Methods). In all cases, the proportion of IS5 mutants ( $\sim$ 60%) was the same.

684 **Figure 3. Effect of Crp binding site mutations on IS5 insertion upstream of the *glpFK***  
685 **promoter region (A) and the promoter activity in  $\Delta$ *cyaA* cells grown in LB medium  $\pm$**

686 **cAMP (B).** The concentrations of cAMP are indicated below the x-axis.  $O_{crp}$  = the mutated Crp  
687 binding sites ( $O_{crpI}$  and  $O_{crpII}$ ) in the upstream regulatory region of the *glpFK* operon to prevent  
688 Crp binding. In b, the activities of the *glpFK* promoter ( $P_{glpFK}$ ) and the same promoter  
689 ( $P_{glpFK_{O_{crp}}}$ ) mutated in  $O_{crpI}$  and  $O_{crpII}$  were measured using the LacZ reporter in both  $\Delta cyaA$   
690 cells and  $\Delta cyaA \Delta glpR$  cells. See Supplementary Table 1 for the detailed strain information.

691 **Figure 4. Effects of *glpR* deletion (A) and *glpR* overexpression (B) on IS5 insertion in the**  
692 **control region of the *glpFK* operon in  $\Delta cyaA$  cells grown in LB  $\pm$  cAMP.** In A, the exogenous  
693 cAMP concentration was either 0 (left) or 0.1 mM (right). In B, vector: no *glpR* expression  
694 (control); GlpR indicates *glpR* expression; cTc = chloro-tetracycline (an inducer of the *tet*  
695 promoter) at the concentrations of 0 (left) or 250 ng/ml (right). *glpR* expression is under the  
696 control of the cTc induced promoter,  $P_{tet}$ , in an expression vector. The  $\Delta cyaA$  cells that  
697 constitutively produce TetR (repressing  $P_{tet}$ ) were used in these experiments. Note scale  
698 difference for Figure 4A and 4B.

699 **Figure 5. IS5 insertion upstream of the *glpFK* control region in wild type cells.** Wild type  
700 cells carrying the *glpFK-cat* (chloroamphenicol acetyl transferase) fusion (See Methods section)  
701 were plated onto M9 + glycerol (0.2%) + 2DG (0.12%) + chloramphenicol (Cm) (55  $\mu$ g/ml) agar  
702 plates. The plates were incubated at 30 °C. After 5 days of incubation, colonies were examined  
703 for the presence of IS5 upstream of the *glpFK* control region by PCR. In both the upper and the  
704 lower panels, a single IS5 insertion was obtained. A DNA marker showing four bands with  
705 known sizes (4 kb, 2 kb, 1 kb and 0.5 kb from above) is indicated in each panel.

706 **Figure 6. Percentages of IS5 mutant populations vs the total populations during growth in**  
707 **M9 + glycerol  $\pm$  cAMP over time using strain  $\Delta cyaA_{Cat}$ .** For the first period [up to 61 h (A  
708 and B) or 45 h (C)], time is expressed in hours. Thereafter (vertical dotted line), time is



709 expressed in numbers of transfers where each transfer took about a day. Figures A-C show the  
710 effects of increasing cAMP concentrations: A, 0; B, 0.1 mM; C, 1 mM.

711 **Figure 7. Percentages of IS5 insertional mutant populations versus total mutant**  
712 **populations over time using the “wild type” strain carrying the chromosomal *glpFK-cat***  
713 **fusion.** Cells were incubated with shaking at 30 °C in 5 ml of M9 + glycerol (0.2%) + 2DG  
714 (0.13%) plus (A) or minus (B) chloramphenicol (Cm) (60 µg/ml) in glass tubes (20 mm x 200  
715 mm). After 2.5 days of incubation, 5 µl cultures were transferred to 5ml of the same media (1<sup>st</sup>  
716 transfer) and incubated with shaking at 30 °C. Later, every two days, 5 µl cultures were  
717 transferred to new media and grown under the same conditions. For every transfer, the cultures  
718 were diluted with carbon source-free M9 salt solution and plated onto M9 + glycerol + 2DG +  
719 Cm agar plates. After 2 days of incubation at 30 °C, 100 colonies were examined by PCR for the  
720 presence of IS5 in the *glpFK* control region (See Figure 5).

721

bioRxiv preprint doi: <https://doi.org/10.1101/046649>; this version posted March 31, 2016. The copyright holder for this preprint (which was not certified by peer review) is the author/funder, who has granted bioRxiv a license to display the preprint in perpetuity. It is made available under aCC-BY-ND 4.0 International license.

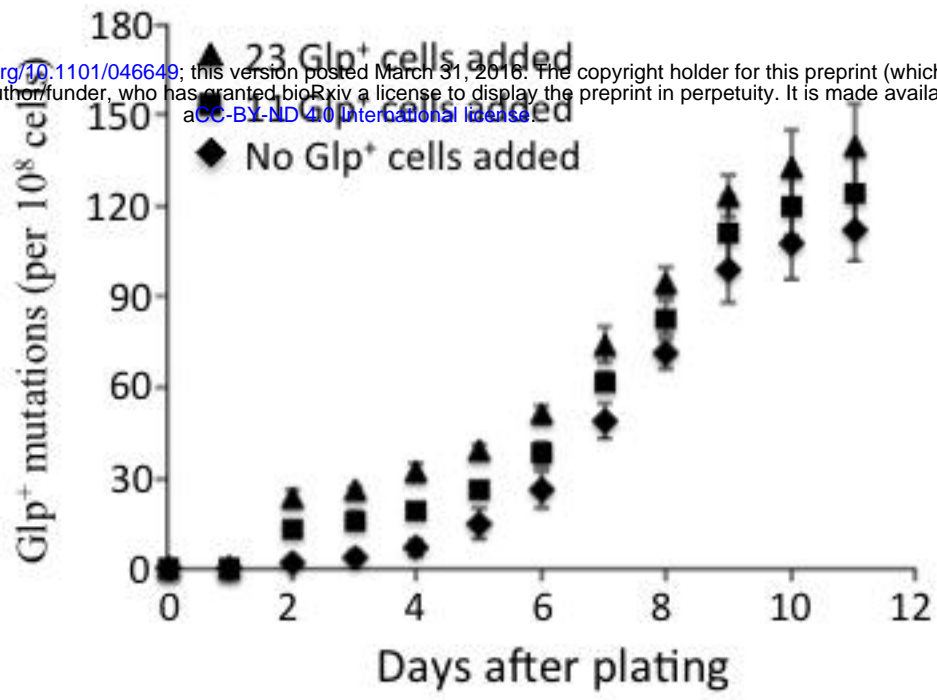

Figure 1

bioRxiv preprint doi: <https://doi.org/10.1101/046649>; this version posted March 16, 2016. The copyright holder for this preprint (which was not certified by peer review) is the author/funder, who has granted bioRxiv a license to display the preprint in perpetuity. It is made available under aCC-BY-ND 4.0 International license.

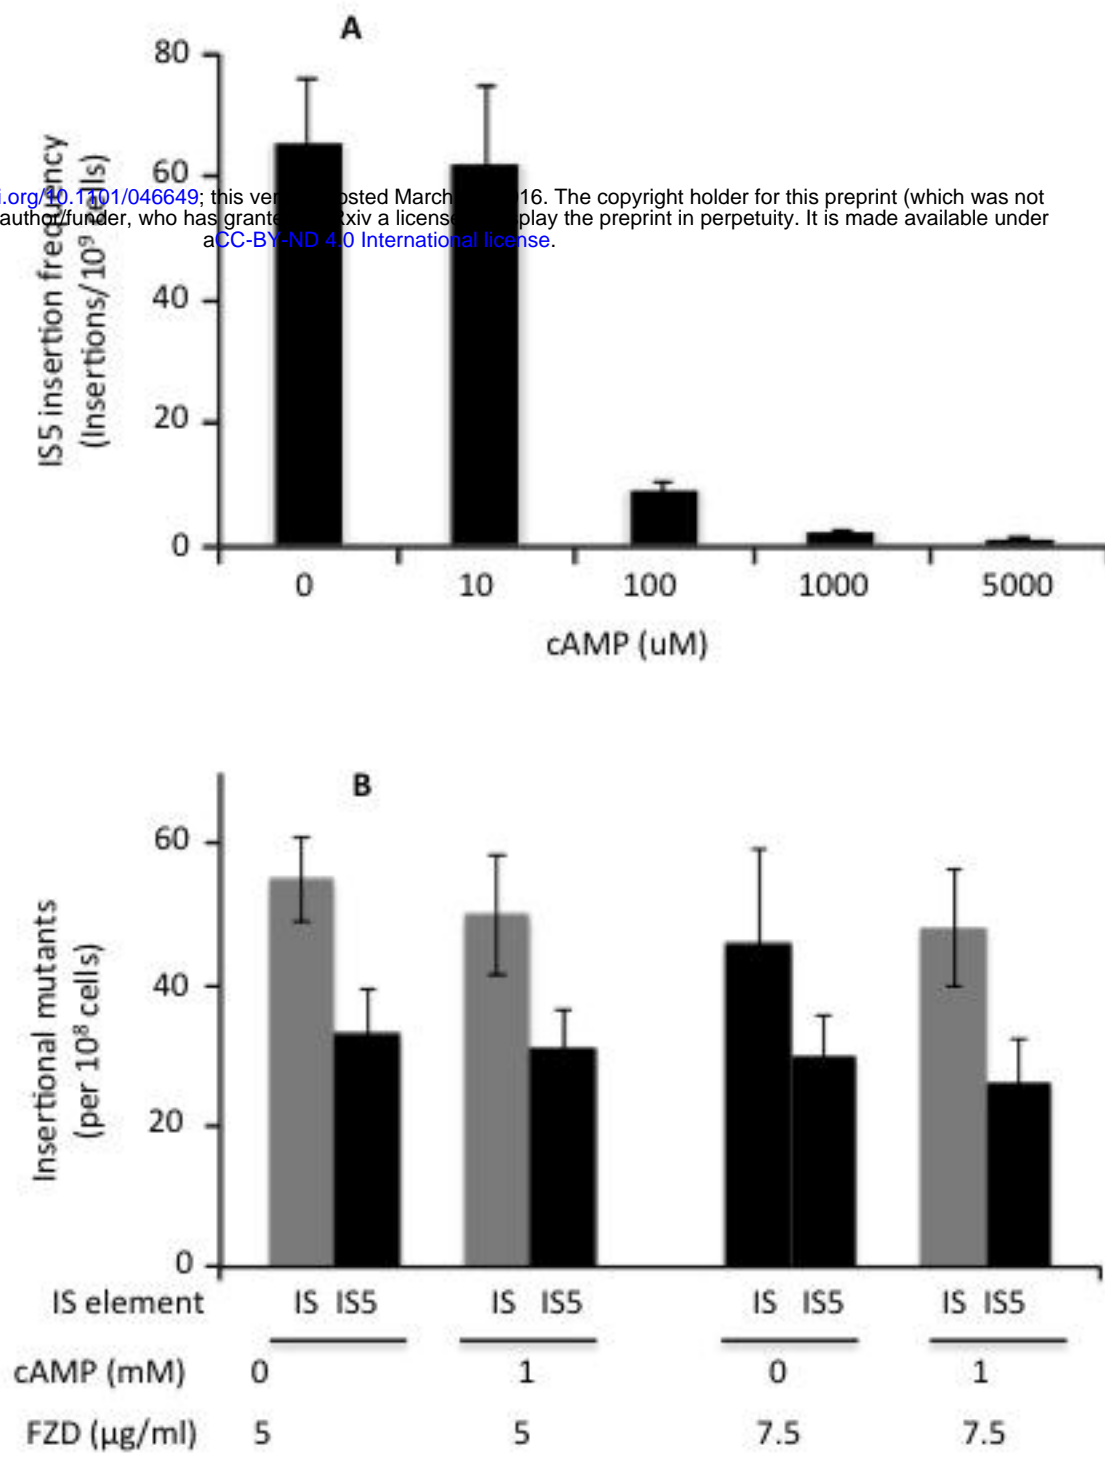

Figure 2

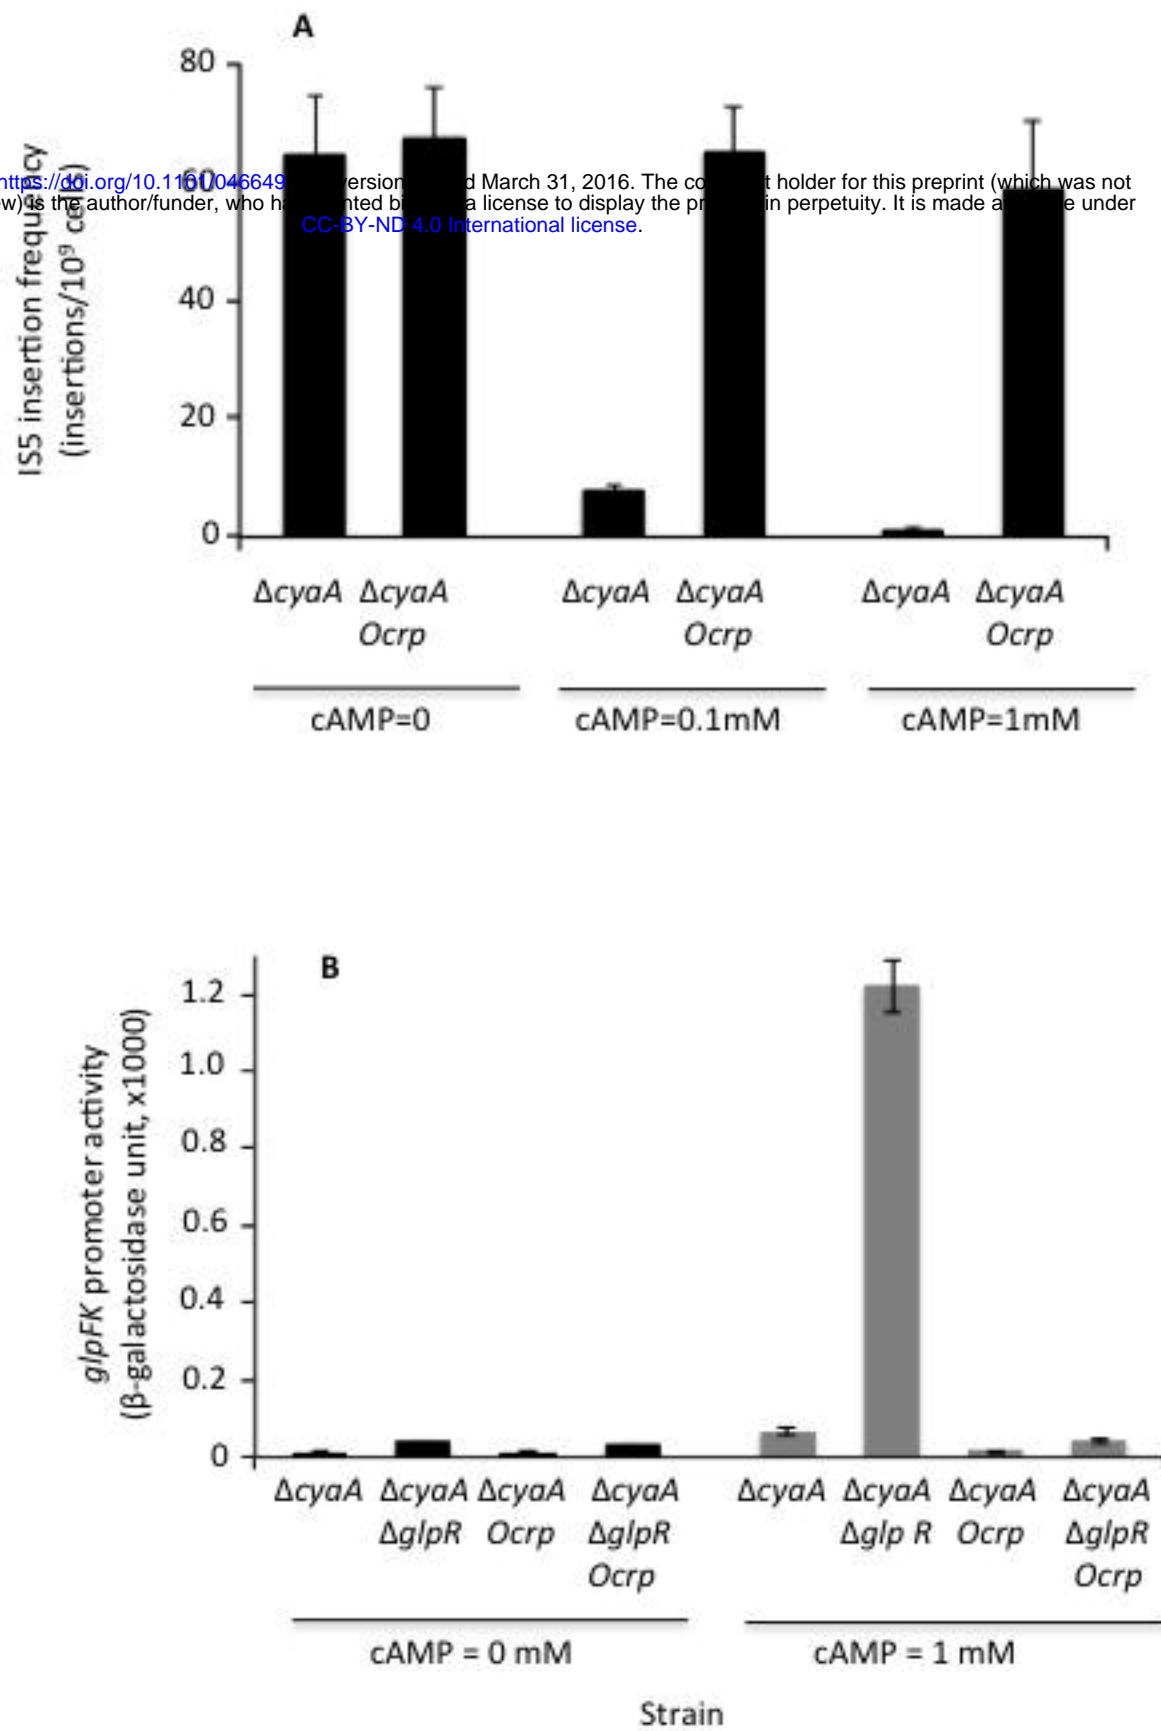

Figure 3

bioRxiv preprint doi: <https://doi.org/10.1101/046649>; this version posted March 31, 2016. The copyright holder for this preprint (which was not certified by peer review) is the author/funder, who has granted bioRxiv a license to display the preprint in perpetuity. It is made available under aCC-BY-ND 4.0 International license.

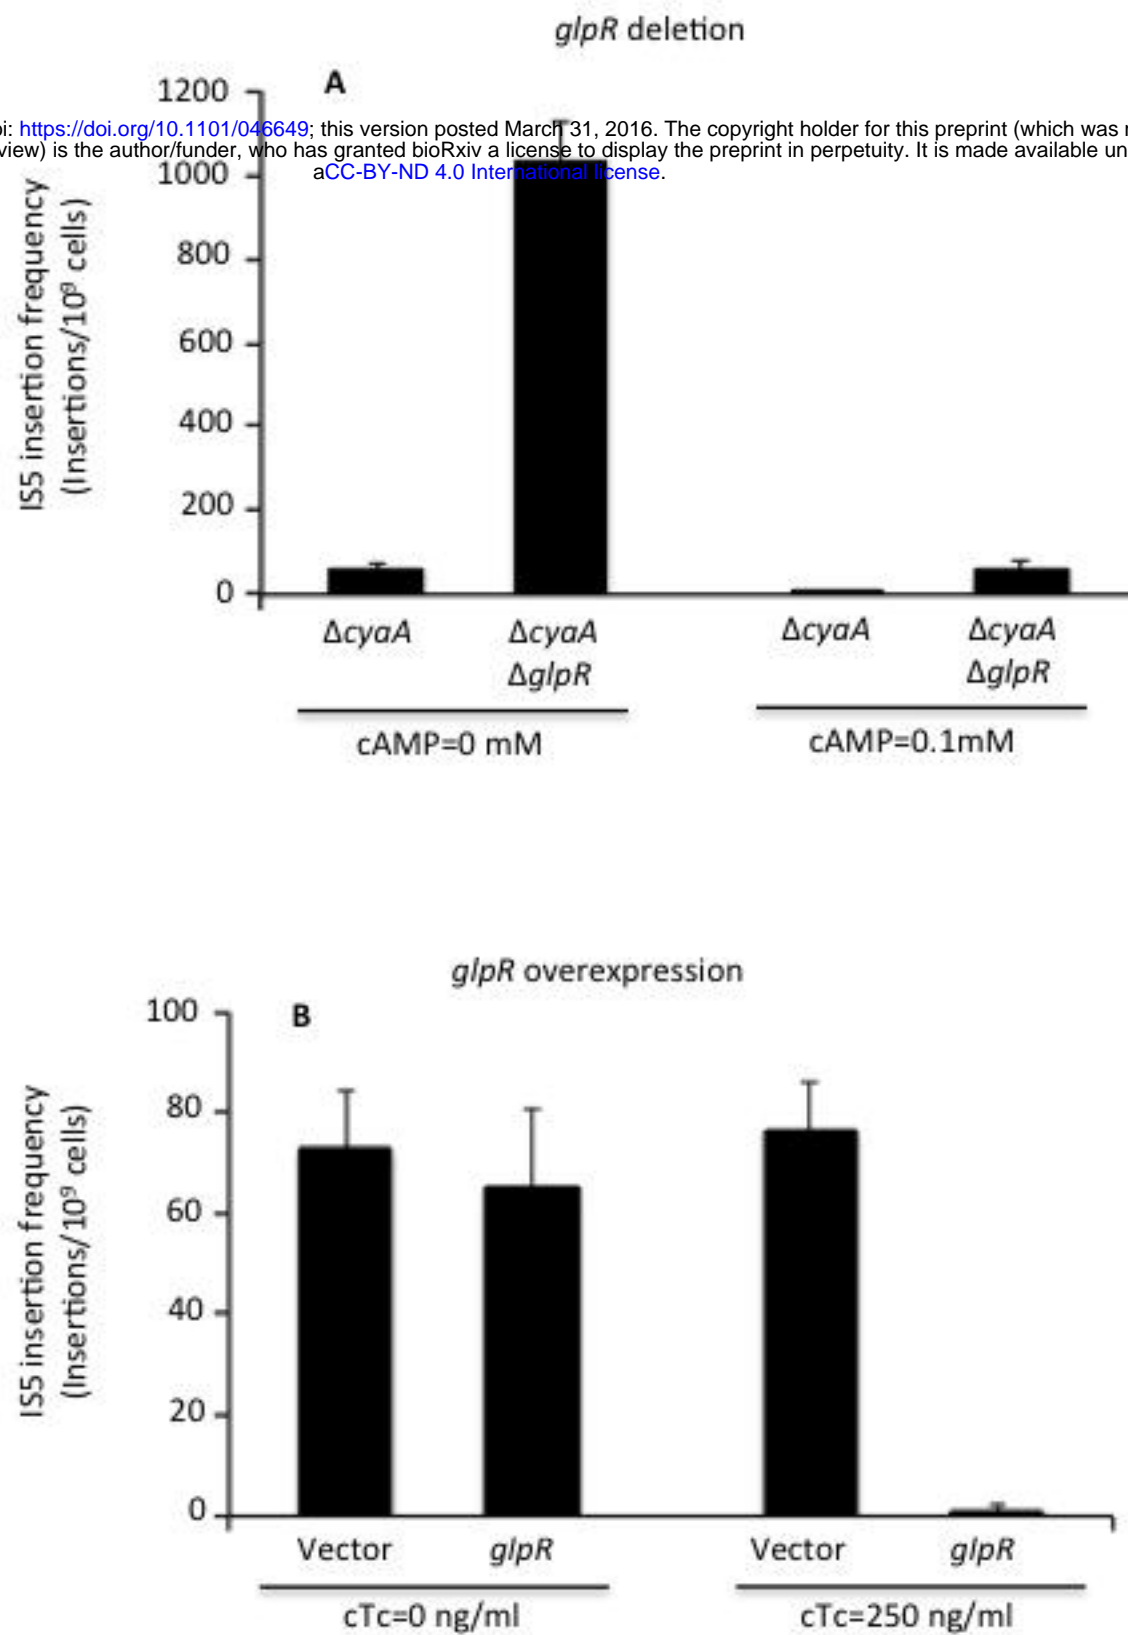

Figure 4

bioRxiv preprint doi: <https://doi.org/10.1101/046649>; this version posted March 31, 2016. The copyright holder for this preprint (which was not certified by peer review) is the author/funder, who has granted bioRxiv a license to display the preprint in perpetuity. It is made available under aCC-BY-ND 4.0 International license.

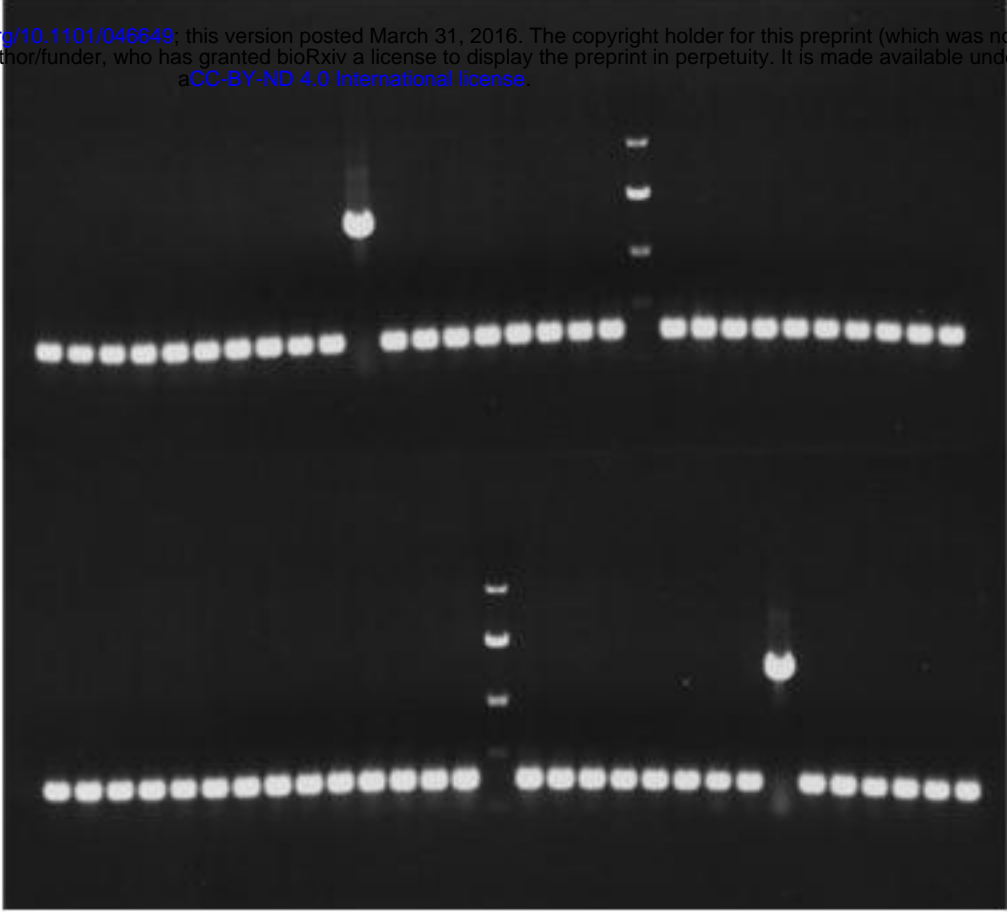

Figure 5

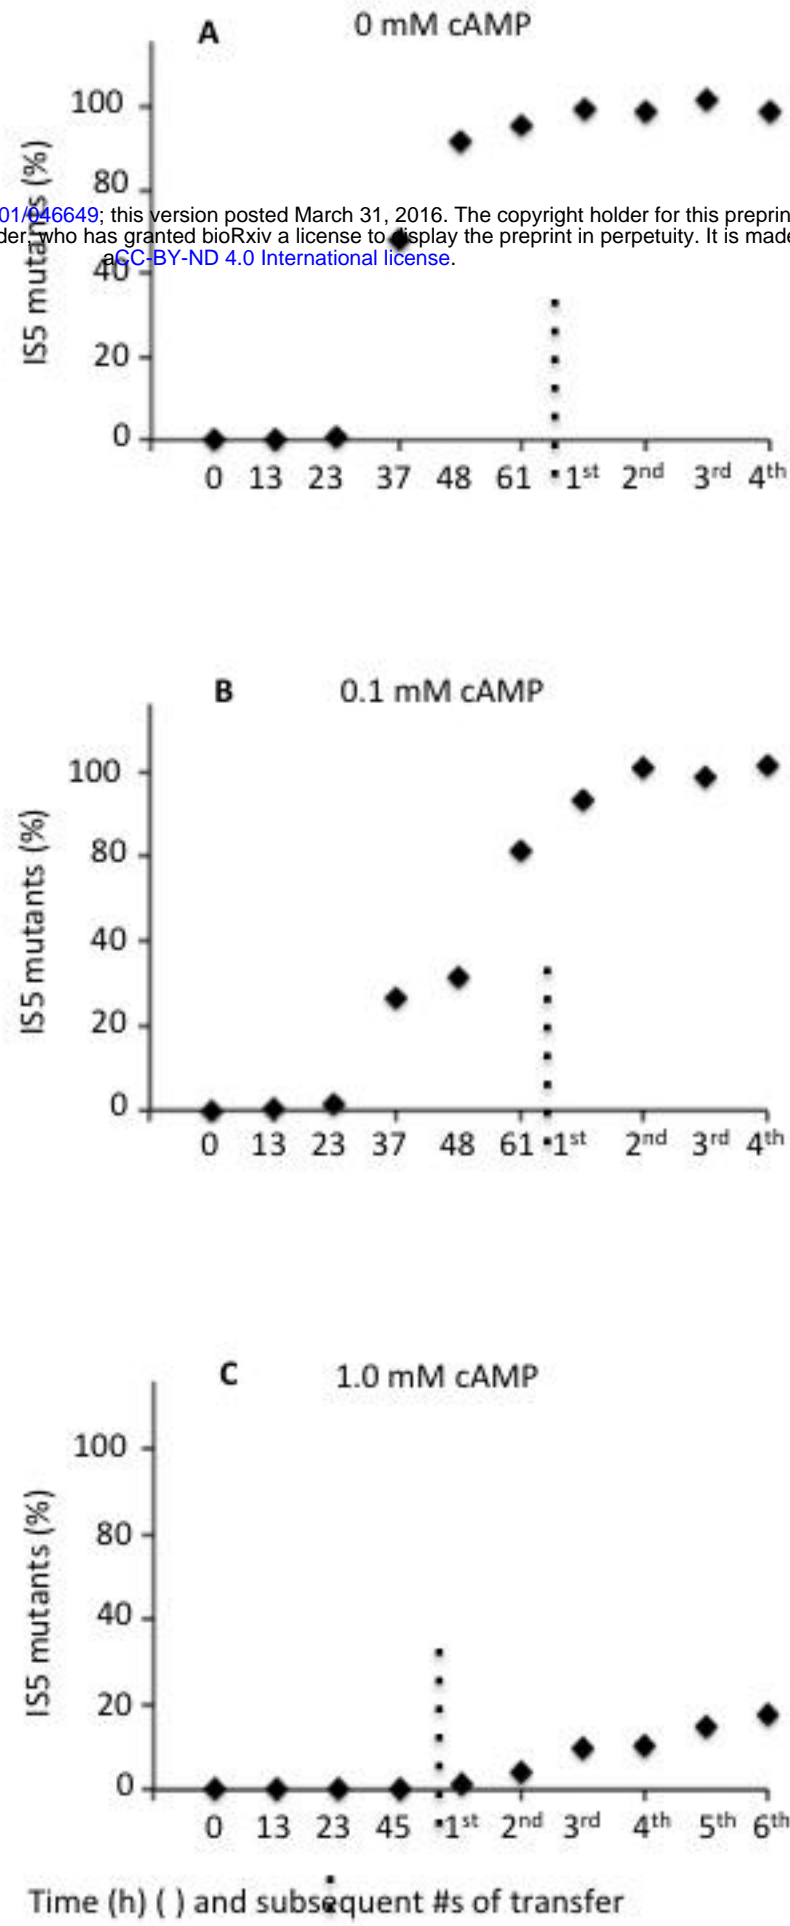

Figure 6

bioRxiv preprint doi: <https://doi.org/10.1101/046649>; this version posted March 31, 2016. The copyright holder for this preprint (which was not certified by peer review) is the author/funder, who has granted bioRxiv a license to display the preprint in perpetuity. It is made available under aCC-BY-ND 4.0 International license.

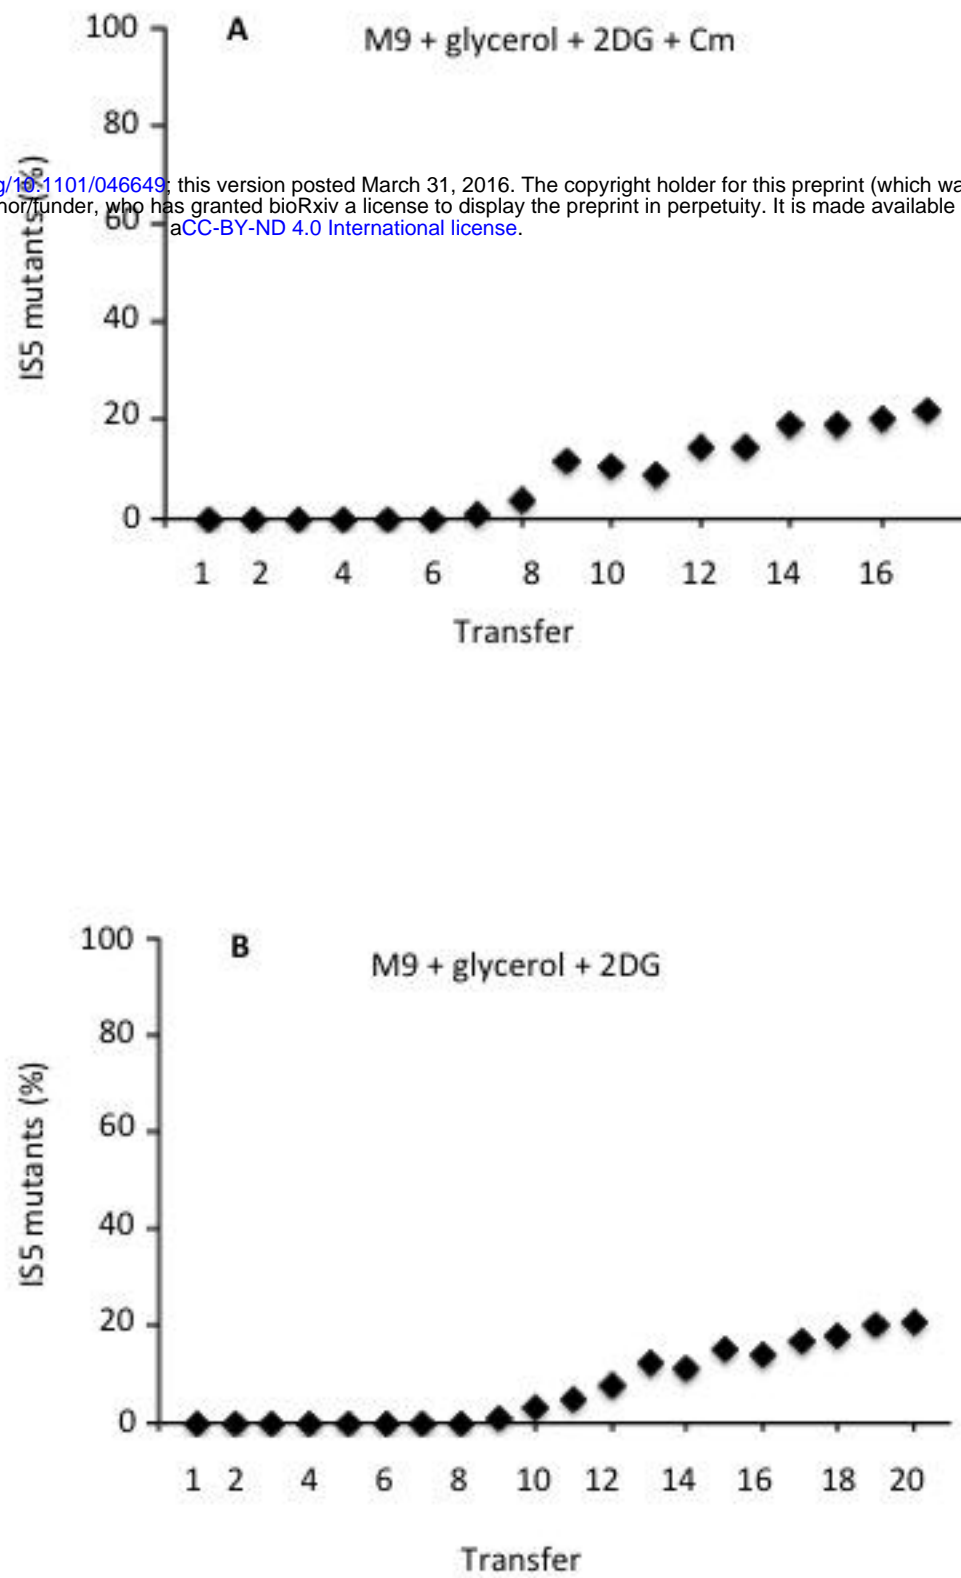

Figure 7



Table 1. Growth of wild type, an IS5 insertional mutant and a non-IS5 mutant on minimal M9 agar plates supplemented with various carbon sources<sup>1,2</sup>.

| Strain         | Glycerol | Sorbitol | Succinate | Xylose | Mannitol |
|----------------|----------|----------|-----------|--------|----------|
| Wild type      | ++       | ++       | ++        | ++     | ++       |
| IS5 mutant     | +++      | ++       | ++        | ++     | ++       |
| Non-IS5 mutant | ++       | +        | +         | ++     | ++       |

<sup>1</sup>Overnight LB cultures from single colonies were washed once with a carbon source-free M9 salt solution. The pellets were resuspended in the same M9 solution, and cells were inoculated onto the agar plates by streaking using a sterile transfer loop.

The plates were incubated at 30 °C for 36 h before being examined for colony sizes.

<sup>2</sup>+, ++ and +++ denote the relative sizes of the colonies. All values are relative to growth of the wild type strain (++) on agar plates containing a single carbon source as indicated. Thus, +++ indicates increased size while + indicates decreased colony size.
